# Supplementary material for: The Influence of Simulated Microgravity on Purinergic Signaling Is Different between Individual Culture and Endothelial and Smooth Muscle Cell Coculture
Source: Hindawi journal article supplement (doi:10.1155/2014/413708), 2014-01-01
Supplement: f1 [file 413708.f1.pdf]

## Supplemental data

**Table 1. Number of Endothelial Cells after Incubation with SMC-Conditioned Medium after 24h and 48h Exposure in Normal Gravity and Simulated Microgravity.**

|               | Medium    | 0h    | 24h          | 48h          |
|---------------|-----------|-------|--------------|--------------|
| EC<br>(Cow 1) | DMEM      | 20000 | 39938 ± 1452 | 67500 ± 1369 |
|               | SMC CM+1g | 20000 | 37125 ± 2054 | 63188 ± 1663 |
|               | SMC CM+MG | 20000 | 33750 ± 1591 | 56813 ± 1281 |
| EC<br>(Cow 2) | DMEM      | 20000 | 40469 ± 1041 | 87500 ± 3536 |
|               | SMC CM+1g | 20000 | 39047 ± 2585 | 82500 ± 2041 |
|               | SMC CM+MG | 20000 | 32266 ± 1094 | 63125 ± 4270 |
| EC<br>(Cow 3) | DMEM      | 20000 | 37708 ± 1301 | 70208 ± 2818 |
|               | SMC CM+1g | 20000 | 36875 ± 3903 | 63542 ± 955  |
|               | SMC CM+MG | 20000 | 23958 ± 955  | 41458 ± 2009 |

**Table 2. The Number of Migrated Endothelial Cells after Incubation with SMC-Conditioned Medium after 24h Exposure in Normal Gravity and Simulated Microgravity.**

|               | Medium    | 24h    |
|---------------|-----------|--------|
| EC<br>(Cow 1) | DMEM      | 94±5   |
|               | SMC CM+1g | 113±8  |
|               | SMC CM+MG | 163±13 |
| EC<br>(Cow 2) | DMEM      | 98±9   |
|               | SMC CM+1g | 112±9  |
|               | SMC CM+MG | 151±20 |
| EC<br>(Cow 3) | DMEM      | 86±5   |
|               | SMC CM+1g | 109±4  |
|               | SMC CM+MG | 138±17 |

**Table 3. Number of Smooth Muscle Cells after Incubation with EC-Conditioned Medium after 24h Exposure in Normal Gravity and Simulated Microgravity.**

|                | Medium   | 0h    | 24h          | 48h           |
|----------------|----------|-------|--------------|---------------|
| SMC<br>(Cow 1) | DMEM     | 20000 | 40500 ± 1472 | 68625 ± 1652  |
|                | EC CM+1g | 20000 | 30625 ± 854  | 54625 ± 2689  |
|                | EC CM+MG | 20000 | 35125 ± 1548 | 65000 ± 2160  |
| SMC<br>(Cow 2) | DMEM     | 20000 | 49594 ± 986  | 142625 ± 5441 |
|                | EC CM+1g | 20000 | 40594 ± 1161 | 94500 ± 4041  |
|                | EC CM+MG | 20000 | 47344 ± 1120 | 122500 ± 5152 |
| SMC<br>(Cow 3) | DMEM     | 20000 | 41500 ± 3000 | 102083 ± 5052 |
|                | EC CM+1g | 20000 | 28167 ± 2566 | 54583 ± 1909  |
|                | EC CM+MG | 20000 | 38167 ± 2021 | 87917 ± 2602  |

**Table 4 The Number of Migrated Smooth Muscle Cells after Incubation with EC-Conditioned Medium after 24h Exposure in Normal Gravity and Simulated Microgravity.**

|                | Medium   | 24h    |
|----------------|----------|--------|
| SMC<br>(Cow 1) | DMEM     | 173±10 |
|                | EC CM+1g | 122±9  |
|                | EC CM+MG | 221±6  |
| SMC<br>(Cow 2) | DMEM     | 169±7  |
|                | EC CM+1g | 129±5  |
|                | EC CM+MG | 208±15 |
| SMC<br>(Cow 3) | DMEM     | 147±11 |
|                | EC CM+1g | 113±6  |
|                | EC CM+MG | 188±15 |

**Table 5 Primer List and RT-PCR Amplification Condition**

| Name                           | Forward Primer (5'→3')                                                 | Size [bp] | Ta [°C] | Mg <sup>2+</sup> [mM] | Cycle |
|--------------------------------|------------------------------------------------------------------------|-----------|---------|-----------------------|-------|
|                                | Reverse Primer (5'→3')                                                 |           |         |                       |       |
| <b>P2X1</b>                    | TCT AYG AGA AGG GCT ACC AGA CC<br>TCC ACC TCC ACG GGG CAC CAG          | 361       | 60      | 2.5                   | 45    |
| <b>P2X2</b>                    | CCA TCA TCA CCA ARG TCA AGG<br>TTG GGG TAG TGG ATG CTG TT              | 391       | 53      | 2.5                   | 45    |
| <b>P2X3</b>                    | GCC GCT GCG TSA ACT ACA<br>GGT GGG RAT GAT GTT GAA CT                  | 560       | 52      | 2.5                   | 45    |
| <b>P2X4</b>                    | TTC CTG TTC GAG TAC GAC ACG<br>GAA TAT GGG GCA GAA GGG ATC             | 659       | 56      | 2.5                   | 40    |
| <b>P2X5</b>                    | GTC ATC GCC AAG AAC AAG AAG GTG<br>CAG TCG GAA GAT GGG GCA GTA G       | 639       | 60      | 2                     | 40    |
| <b>P2X6</b>                    | GTT CTT CTT GGT GAC CAA CTT CC<br>CGG ATY CCA TAG AGC TTG AGC A        | 678       | 58      | 2                     | 42    |
| <b>P2X7</b>                    | GGT TGT AAA AAG GGA TGG WTG G<br>ACA GCA CTT GCA MCA GGG ATA A         | 723       | 55      | 3                     | 45    |
| <b>P2Y1</b>                    | CTT CCT GGG CAA CAG CGT GGC<br>CAG CAC CAA GGG GAC ACA GAA CAT         | 502       | 61      | 3                     | 40    |
| <b>P2Y2</b>                    | TGT GCC GCC TCA AGA CCT GGA A<br>GAA GGA GTA GTA GAG GGT GCG G         | 638       | 60      | 1.5                   | 40    |
| <b>P2Y4</b>                    | GAK TTC AAG TTC ATC CTG CTG<br>TGA GYC CAT AGC ARA CAA GAG T           | 574       | 52      | 2                     | 45    |
| <b>P2Y6</b>                    | CGG GCY GCC TGG CTA GTG TG<br>TTG GTG ATG TGR AAA GGC AGG AAG C        | 354       | 61      | 2                     | 45    |
| <b>P2Y11</b>                   | AGC GTC ATC TTC ATC ACC TG<br>CAT GTA GAG TAG MGG GTG GA               | 621       | 52      | 2                     | 45    |
| <b>P2Y12</b>                   | ATC GCT ACC AGA ARA CCA CCA GGC<br>CGG GCA AAA TGG AAW GGA ACA AAA CA  | 406       | 60      | 2.5                   | 45    |
| <b>P2Y13</b>                   | TGA GCA ACA AGG AAG CAA CAC CAT C<br>ACA CAA AGA AGA CAG CCA CGA CAA C | 258       | 60      | 3                     | 45    |
| <b>P2Y14</b>                   | ATG TAC GTC AGC ATY GTG TTC TT<br>TAG GGG ATT CTG GCA ATR TGG T        | 455       | 56      | 2                     | 45    |
| <b>VEGFR2</b>                  | GAG AGG TGC TGC TYM GAT TT<br>GGA AGG AAC TCT CAT TAG GA               | 649       | 52      | 1.5                   | 40    |
| <b>PECAM-1</b>                 | GGT RAT AGC CCC RGT GGA TGA<br>TTG GCC TTG GCT TTC CTC AG              | 411       | 59      | 2.5                   | 42    |
| <b>VE-cadherin</b>             | CTG CAT CCT CAC CAT CAC AGT<br>CTC GTA GCC GTA GAT GTG CAG             | 384       | 61      | 1                     | 40    |
| <b>Calponin</b>                | RCA GAT GGG CAG CAA CAA GG<br>ATT TAT TGT GCT CCA GTG AAR TAG AA       | 443       | 51      | 3.5                   | 35    |
| <b>SMA-<math>\alpha</math></b> | CAG GGC TGT TTT CCC ATC<br>CCA TCT CCA GAG TCC AGC A                   | 393       | 51      | 1.5                   | 30    |
| <b>MYH-11</b>                  | GGG CAG AGC AAA ATC TTC TT<br>GTT TCT TGA TCT TGG CCT CAG              | 658       | 51      | 2                     | 42    |
| <b>GAPDH</b>                   | CGT ATT GGG CGC CTG GTC ACC<br>GCC AGT GAG CTT CCC GTT CAG C           | 653       | 61      | 2.5                   | 22    |

The amplification conditions for each specific product were conducted as followed: the initial denaturation was performed at 94°C for 3 min and cyclic denaturation was run for 30 seconds. The cyclic annealing step was performed for 30 seconds with the respective annealing temperatures (see table 5). The target gene was elongated at 72°C for 45 seconds. The cyclic amplification was repeated

with different numbers (see table 5). A final extension of 3 min at 72°C was set with subsequent cooling down to 4°C. GAPDH served as the housekeeping gene controls, which were adjusted to equal levels prior to the comparison of genes of interest. The RT-PCR product was evaluated with 1% agarose gel electrophoresis. The images of gels were taken with a Bio-Rad Chemidoc machine. The cell line HMEC-1 and C2 were used as positive controls to confirm the EC and SMC specific markers, respectively. Since no single cell type can express all P2 receptor subtypes, different positive controls were used here: HMEC-1 for P2X3, P2X4, P2X5, P2X7, P2Y1, P2Y2, P2Y4, P2Y11, P2Y12; MG-63 for P2X6, P2Y6 and U-87 MG for P2X1, P2X2, P2Y13, P2Y14. The GAPDH of the positive control is only given for HMEC-1 as representative for all three positive controls.
